# Supplementary material for: Bacterial Communities Associated with Different Anthurium andraeanum L. Plant Tissues
Source: PubMed Central journal article supplement (PMC5017810; doi:10.1264/jsme2.me16099), 2016-08-11
Supplement: 31_321_s1.pdf [file 31_321_s1.pdf]

**Table S1** Summary of samples and pyrosequencing data analysis.

| Sample      | Barcode sequence | Number of high quality reads <sup>a</sup> | Number of reads after denoising | Number of reads after filter <sup>b</sup> |
|-------------|------------------|-------------------------------------------|---------------------------------|-------------------------------------------|
| Substrate   | TGCTCGCTAC       | 1207                                      | 1086                            | 1080                                      |
|             | ACGTGCAGCG       | 579                                       | 463                             | 463                                       |
|             | ACTCACAGAG       | 1170                                      | 1053                            | 1033                                      |
|             | AGACTCAGCG       | 2189                                      | 1602                            | 1502                                      |
|             | AGAGAGTGTG       | 776                                       | 641                             | 541                                       |
| Rhizosphere | AGCTATCGCG       | 1640                                      | 1558                            | 1467                                      |
|             | AGTCTGACTG       | 1342                                      | 1168                            | 1160                                      |
|             | AGTGAGCTCG       | 384                                       | 354                             | 244                                       |
|             | ATAGCTCTCG       | 679                                       | 624                             | 504                                       |
|             | ATCACGTGCG       | 2263                                      | 2215                            | 2196                                      |
| Roots       | CTATAGCGTA       | 3690                                      | 3321                            | 112                                       |
|             | TATGCTAGTA       | 2702                                      | 2162                            | 88                                        |
|             | TGAGTCAGTA       | 477                                       | 334                             | 102                                       |
|             | ACAGTCGTGC       | 3166                                      | 2533                            | 84                                        |
|             | ACTCGCGCAC       | 3330                                      | 3164                            | 107                                       |
| Stem        | CCTACGCTCTA      | 5232                                      | 4552                            | 172                                       |
|             | TCACGCGAGA       | 4747                                      | 4272                            | 166                                       |
|             | TGTAGTGTGA       | 2157                                      | 1726                            | 157                                       |
|             | ACATGACGAC       | 2170                                      | 1953                            | 106                                       |
|             | AGAGCGTCAC       | 3031                                      | 2122                            | 131                                       |
| Leaves      | TACGTCATCA       | 2327                                      | 1862                            | 111                                       |
|             | TCACGCGAGA       | 2746                                      | 2581                            | 101                                       |
|             | TGTAGTGTGA       | 2725                                      | 2453                            | 122                                       |
|             | ACATGACGAC       | 3503                                      | 2802                            | 103                                       |
|             | AGAGCGTCAC       | 2836                                      | 1985                            | 130                                       |
| Spathe      | TAGTCGCATA       | 3180                                      | 2544                            | 128                                       |
|             | TCGCTGCGTA       | 964                                       | 916                             | 105                                       |
|             | TGTCGTCGCA       | 1515                                      | 1318                            | 98                                        |
|             | ACGTCTCATC       | 3643                                      | 3279                            | 115                                       |
|             | AGTAGTGATC       | 2256                                      | 1805                            | 132                                       |
| Spadix      | TATATATACA       | 5029                                      | 4526                            | 109                                       |
|             | TCTGACGTCA       | 4498                                      | 3149                            | 122                                       |
|             | ACACATACGC       | 2770                                      | 2216                            | 120                                       |
|             | ACTCATCTAC       | 5097                                      | 4842                            | 99                                        |
|             | AGTGACACAC       | 1321                                      | 1149                            | 150                                       |
| Total count |                  | 87341                                     | 74100                           | 13160                                     |

<sup>a</sup> Reads at high quality i.e. >200 bp in length, > 25 phred quality threshold and containing any unresolved nucleotides. <sup>b</sup> Datasets without sequences belonged to 16S rRNA of the chloroplast from the plant

**Table S2** Relative abundance of bacterial genus found in the substrate, and associated with the rhizosphere and endosphere of healthy *Anthurium andraeanum* L. plants.

| Taxon                                                                                                | Relative abundance (%) |             |            |
|------------------------------------------------------------------------------------------------------|------------------------|-------------|------------|
|                                                                                                      | Substrate              | Rhizosphere | Endosphere |
| Firmicutes; Bacilli; Lactobacillales; Aerococcaceae; <i>Alkalibacterium</i>                          | 0                      | 0           | 1.156      |
| Firmicutes; Clostridia; Clostridiales; Clostridiaceae; <i>Alkaliphilus</i>                           | 0                      | 0           | 0.420      |
| Firmicutes; Clostridia; Clostridiales; Veillonellaceae; <i>Pelosinus</i>                             | 0                      | 0           | 2.313      |
| Firmicutes; Bacilli; Haloplasmatales; Haloplasmataceae                                               | 0                      | 0           | 1.197      |
| Proteobacteria; Gammaproteobacteria; Xanthomonadales; Xanthomonadaceae; <i>Xanthomonas</i>           | 0                      | 0           | 0.420      |
| Tenericutes; Mollicutes; Anaeroplasmatales; Anaeroplasmataceae; <i>Asteroleplasma</i>                | 0                      | 0           | 1.892      |
| Actinobacteria; Actinobacteria; Actinomycetales; Propionibacteriaceae; <i>Propionibacterium</i>      | 0                      | 0.031       | 0.525      |
| Firmicutes; Clostridia; Clostridiales; Peptostreptococcaceae; <i>Clostridium</i>                     | 0                      | 0.015       | 3.259      |
| Proteobacteria; Betaproteobacteria; Burkholderiales; Alcaligenaceae; <i>Achromobacter</i>            | 0                      | 0.031       | 3.785      |
| Proteobacteria; Gammaproteobacteria; Xanthomonadales; Xanthomonadaceae; <i>Stenotrophomonas</i>      | 0                      | 0.031       | 0.630      |
| Actinobacteria; Actinobacteria; Actinomycetales; Cellulomonadaceae; <i>Demequina</i>                 | 0                      | 0.031       | 0          |
| Actinobacteria; Actinobacteria; Actinomycetales; Nocardiopsaceae; <i>Thermobifida</i>                | 0                      | 0.047       | 0          |
| Bacteroidetes; [Saprospirae]; [Saprospirales]; Chitinophagaceae; <i>Flavisolibacter</i>              | 0                      | 0.031       | 0          |
| Chloroflexi; Anaerolineae; Caldilineales; Caldilineaceae; <i>Caldilinea</i>                          | 0                      | 0.047       | 0          |
| Firmicutes; Bacilli; Bacillales; Paenibacillaceae; <i>Thermobacillus</i>                             | 0                      | 0.063       | 0          |
| Firmicutes; Bacilli; Bacillales; Thermoactinomycetaceae; <i>Laceyella</i>                            | 0                      | 0.031       | 0          |
| Firmicutes; Clostridia; Clostridiales; Clostridiaceae; <i>Oxobacter</i>                              | 0                      | 0.079       | 0          |
| GN02; GKS2-174                                                                                       | 0                      | 0.031       | 0          |
| Planctomycetes; Planctomycetia; Planctomycetales; Planctomycetaceae; <i>Planctomyces</i>             | 0                      | 0.127       | 0          |
| Proteobacteria; Alphaproteobacteria; Caulobacterales; Caulobacteraceae; <i>Asticcacaulis</i>         | 0                      | 0.047       | 0          |
| Proteobacteria; Alphaproteobacteria; Rhizobiales; Methylocystaceae; <i>Pleomorphomonas</i>           | 0                      | 0.047       | 0          |
| Proteobacteria; Alphaproteobacteria; Sphingomonadales; Sphingomonadaceae; <i>Novosphingobium</i>     | 0                      | 0.079       | 0          |
| Proteobacteria; Deltaproteobacteria; Bdellovibrionales; Bdellovibrionaceae; <i>Bdellovibrio</i>      | 0                      | 0.031       | 0          |
| Proteobacteria; Deltaproteobacteria; Myxococcales; Nannocystaceae; <i>Plesiocystis</i>               | 0                      | 0.111       | 0          |
| Verrucomicrobia; [Spartobacteria]; [Chthoniobacteriales]; [Chthoniobacteraceae]; DA101               | 0                      | 0.063       | 0          |
| WS3; PRR-12; Sediment-1; CV106;                                                                      | 0                      | 0.031       | 0          |
| Proteobacteria; Alphaproteobacteria; Rhizobiales; Rhizobiaceae; <i>Rhizobium</i>                     | 0.016                  | 0           | 0.315      |
| Acidobacteria; Solibacteres; Solibacterales; Solibacteraceae; <i>Candidatus Solibacter</i>           | 0.033                  | 0           | 0          |
| Armatimonadetes; 0319-6E2                                                                            | 0.033                  | 0           | 0          |
| Bacteroidetes; Sphingobacteriia; Sphingobacteriales; Sphingobacteriaceae; <i>Solitalea</i>           | 0.050                  | 0           | 0          |
| BRC1; PRR-11                                                                                         | 0.033                  | 0           | 0          |
| Firmicutes; Bacilli; Bacillales; Bacillaceae; <i>Ornithinibacillus</i>                               | 0.033                  | 0           | 0          |
| Firmicutes; Bacilli; Bacillales; Planococcaceae; <i>Ureibacillus</i>                                 | 0.084                  | 0           | 0          |
| Firmicutes; Bacilli; Bacillales; Thermoactinomycetaceae; <i>Thermoactinomyces</i>                    | 0.033                  | 0           | 0          |
| GOUTA4                                                                                               | 0.067                  | 0           | 0          |
| OD1                                                                                                  | 0.033                  | 0           | 0          |
| OP11; WCHB1-64                                                                                       | 0.033                  | 0           | 0          |
| Planctomycetes; Planctomycetia; Pirellulales; Pirellulaceae; A17                                     | 0.033                  | 0           | 0          |
| Proteobacteria; Alphaproteobacteria; Sphingomonadales; Erythrobacteraceae; <i>Altererythrobacter</i> | 0.033                  | 0           | 0          |
| Proteobacteria; Betaproteobacteria; Burkholderiales; Comamonadaceae; <i>Curvibacter</i>              | 0.067                  | 0           | 0          |
| Proteobacteria; Gammaproteobacteria; [Marinicellales]; [Marinicellaceae]                             | 0.084                  | 0           | 0          |
| Verrucomicrobia; [Spartobacteria]; [Chthoniobacteriales]; [Chthoniobacteraceae]                      | 0.033                  | 0           | 0          |
| Actinobacteria; Actinobacteria; Actinomycetales; Microbacteriaceae; <i>Microbacterium</i>            | 0.067                  | 0.063       | 0.736      |
| Actinobacteria; Actinobacteria; Actinomycetales; Streptomycetaceae; <i>Streptomyces</i>              | 0.050                  | 0.222       | 1.366      |
| Armatimonadetes; [Fimbriimonadia]; [Fimbriimonadales]; [Fimbriimonadaceae]; <i>Fimbriimonas</i>      | 0.777                  | 0.413       | 0.630      |
| Bacteroidetes; Flavobacteriia; Flavobacteriales; Flavobacteriaceae; <i>Flavobacterium</i>            | 0.473                  | 0.524       | 1.261      |
| Firmicutes; Bacilli; Bacillales; Alicyclobacillaceae; <i>Alicyclobacillus</i>                        | 0.050                  | 0.015       | 0.210      |
| Firmicutes; Bacilli; Bacillales; Paenibacillaceae; <i>Brevibacillus</i>                              | 0.067                  | 0.095       | 6.203      |
| Firmicutes; Bacilli; Bacillales; Paenibacillaceae; <i>Paenibacillus</i>                              | 0.067                  | 0.031       | 0.630      |
| Firmicutes; Clostridia; Clostridiales; Clostridiaceae; <i>Clostridium</i>                            | 0.033                  | 0.015       | 1.997      |
| Firmicutes; Clostridia; Clostridiales; Peptostreptococcaceae; [ <i>Clostridium</i> ]                 | 0.033                  | 0.095       | 2.103      |
| Proteobacteria; Alphaproteobacteria; Rhizobiales; Bradyrhizobiaceae; <i>Bradyrhizobium</i>           | 0.355                  | 0.142       | 0.210      |
| Proteobacteria; Alphaproteobacteria; Rhizobiales; Hyphomicrobiaceae; <i>Devosia</i>                  | 0.811                  | 1.191       | 0.315      |
| Proteobacteria; Alphaproteobacteria; Rhizobiales; Rhizobiaceae; <i>Sinorhizobium</i>                 | 0.016                  | 0.524       | 0.315      |
| Proteobacteria; Betaproteobacteria; Burkholderiales; Comamonadaceae; <i>Acidovorax</i>               | 0.016                  | 0.031       | 0.210      |
| Proteobacteria; Betaproteobacteria; Burkholderiales; Comamonadaceae; <i>Ramlibacter</i>              | 0.067                  | 0.047       | 0.105      |
| Proteobacteria; Betaproteobacteria; Burkholderiales; Comamonadaceae; <i>Variovorax</i>               | 0.084                  | 0.047       | 0.841      |
| Proteobacteria; Betaproteobacteria; Rhodocyclales; Rhodocyclaceae; <i>Azoarcus</i>                   | 0.084                  | 0.031       | 0.105      |
| Proteobacteria; Gammaproteobacteria; Oceanospirillales; Halomonadaceae; <i>Halomonas</i>             | 0.388                  | 0.413       | 0.630      |
| Proteobacteria; Gammaproteobacteria; Pseudomonadales; Moraxellaceae; <i>Acinetobacter</i>            | 0.338                  | 0.063       | 5.047      |
| Proteobacteria; Gammaproteobacteria; Pseudomonadales; Pseudomonadaceae; <i>Pseudomonas</i>           | 0.490                  | 0.571       | 27.339     |
| Actinobacteria; Actinobacteria; Actinomycetales; Microbacteriaceae; <i>Agromyces</i>                 | 0.169                  | 0.063       | 0          |
| Actinobacteria; Actinobacteria; Actinomycetales; Microbacteriaceae; <i>Cryocolla</i>                 | 0.067                  | 0.015       | 0          |
| Actinobacteria; Actinobacteria; Actinomycetales; Mycobacteriaceae; <i>Mycobacterium</i>              | 0.371                  | 0.301       | 0          |
| Actinobacteria; Actinobacteria; Actinomycetales; Nocardioidaceae; <i>Nocardioides</i>                | 0.236                  | 0.158       | 0          |
| Actinobacteria; Actinobacteria; Actinomycetales; Promicromonosporaceae; <i>Xylanimicrobium</i>       | 0.016                  | 0.015       | 0          |

Table S2 (continued)

| Taxon                                                                                            | Substrate | Rhizosphere | Endosphere |
|--------------------------------------------------------------------------------------------------|-----------|-------------|------------|
| Actinobacteria; Actinobacteria; Actinomycetales; Pseudonocardiaceae; <i>Saccharomonospora</i>    | 0.016     | 0.031       | 0          |
| Actinobacteria; Actinobacteria; Actinomycetales; Williamsiaceae; <i>Williamsia</i>               | 0.033     | 0.031       | 0          |
| Actinobacteria; Thermoleophilia; Solirubrobacterales; Conexibacteraceae; <i>Conexibacter</i>     | 0.135     | 0.063       | 0          |
| Bacteroidetes; [Saprosirae]; [Saprosirales]; Chitinophagaceae; <i>Flaviumibacter</i>             | 0.033     | 0.031       | 0          |
| Bacteroidetes; Cytophagia; Cytophagales; Cytophagaceae; <i>Adhaeribacter</i>                     | 0.050     | 0.047       | 0          |
| Firmicutes; Bacilli; Bacillales; Bacillaceae; <i>Bacillus</i>                                    | 1.690     | 1.064       | 0          |
| Firmicutes; Bacilli; Bacillales; Planococcaceae; <i>Lysinibacillus</i>                           | 0.033     | 0.047       | 0          |
| Firmicutes; Bacilli; Bacillales; Planococcaceae; <i>Solibacillus</i>                             | 0.118     | 0.158       | 0          |
| Firmicutes; Bacilli; Bacillales; Thermoactinomycetaceae; <i>Planifilum</i>                       | 0.439     | 0.222       | 0          |
| Nitrospirae; Nitrospira; Nitrospirales; Nitrospiraceae; <i>Nitrospira</i>                        | 1.183     | 0.841       | 0          |
| Proteobacteria; Alphaproteobacteria; Caulobacterales; Caulobacteraceae; <i>Phenylobacterium</i>  | 0.304     | 0.428       | 0          |
| Proteobacteria; Alphaproteobacteria; Rhizobiales; Bradyrhizobiaceae; <i>Balneimona</i>           | 0.067     | 0.142       | 0          |
| Proteobacteria; Alphaproteobacteria; Rhizobiales; Hyphomicrobiaceae; <i>Hyphomicrobium</i>       | 0.422     | 0.683       | 0          |
| Proteobacteria; Alphaproteobacteria; Rhizobiales; Hyphomicrobiaceae; <i>Pedomicrobium</i>        | 0.405     | 0.333       | 0          |
| Proteobacteria; Alphaproteobacteria; Rhizobiales; Hyphomicrobiaceae; <i>Rhodoplanes</i>          | 6.729     | 6.973       | 0          |
| Proteobacteria; Alphaproteobacteria; Rhizobiales; Methylobacteriaceae; <i>Methylobacterium</i>   | 0.185     | 0.158       | 0          |
| Proteobacteria; Alphaproteobacteria; Rhizobiales; Phyllobacteriaceae; <i>Mesorhizobium</i>       | 0.490     | 0.317       | 0          |
| Proteobacteria; Alphaproteobacteria; Rhizobiales; Rhizobiaceae; <i>Agrobacterium</i>             | 0.050     | 0.095       | 0          |
| Proteobacteria; Alphaproteobacteria; Rhizobiales; Rhodobiaceae; <i>Ajifella</i>                  | 0.067     | 0.031       | 0          |
| Proteobacteria; Alphaproteobacteria; Rhizobiales; Xanthobacteraceae; <i>Labrys</i>               | 0.033     | 0.015       | 0          |
| Proteobacteria; Alphaproteobacteria; Rhodobacterales; Rhodobacteraceae; <i>Amaricoccus</i>       | 0.050     | 0.095       | 0          |
| Proteobacteria; Alphaproteobacteria; Sphingomonadales; Sphingomonadaceae; <i>Sphingobium</i>     | 0.101     | 0.158       | 0          |
| Proteobacteria; Alphaproteobacteria; Sphingomonadales; Sphingomonadaceae; <i>Sphingopyxis</i>    | 0.033     | 0.047       | 0          |
| Proteobacteria; Betaproteobacteria; Burkholderiales; Burkholderiaceae; <i>Burkholderia</i>       | 0.050     | 0.063       | 0          |
| Proteobacteria; Betaproteobacteria; Burkholderiales; Comamonadaceae; <i>Methylibium</i>          | 0.050     | 0.047       | 0          |
| Proteobacteria; Betaproteobacteria; Burkholderiales; Comamonadaceae; <i>Rubrivivax</i>           | 0.422     | 0.365       | 0          |
| Proteobacteria; Betaproteobacteria; Burkholderiales; Oxalobacteraceae; <i>Cupriavidus</i>        | 0.118     | 0.047       | 0          |
| Proteobacteria; Betaproteobacteria; Burkholderiales; Oxalobacteraceae; <i>Ralstonia</i>          | 0.033     | 0.079       | 0          |
| Proteobacteria; Gammaproteobacteria; Legionellales; Coxiellaceae; <i>Aquicella</i>               | 0.185     | 0.238       | 0          |
| Proteobacteria; Gammaproteobacteria; Legionellales; Legionellaceae; <i>Legionella</i>            | 0.016     | 0.111       | 0          |
| Proteobacteria; Gammaproteobacteria; Xanthomonadales; Sinobacteraceae; <i>Alkanibacter</i>       | 0.304     | 0.142       | 0          |
| Proteobacteria; Gammaproteobacteria; Xanthomonadales; Sinobacteraceae; <i>Steroidobacter</i>     | 0.135     | 0.190       | 0          |
| Proteobacteria; Gammaproteobacteria; Xanthomonadales; Xanthomonadaceae; <i>Dokdonella</i>        | 0.033     | 0.047       | 0          |
| Proteobacteria; Gammaproteobacteria; Xanthomonadales; Xanthomonadaceae; <i>Lysobacter</i>        | 0.270     | 0.222       | 0          |
| Proteobacteria; Gammaproteobacteria; Xanthomonadales; Xanthomonadaceae; <i>Rhodanobacter</i>     | 0.879     | 0.301       | 0          |
| Proteobacteria; Gammaproteobacteria; Xanthomonadales; Xanthomonadaceae; <i>Thermomonas</i>       | 0.169     | 0.349       | 0          |
| Verrucomicrobia; Opitutae; Opitutales; Opitutaceae; <i>Opitutus</i>                              | 0.033     | 0.111       | 0          |
| Verrucomicrobia; Verrucomicrobiae; Verrucomicrobiales; Verrucomicrobiaceae; <i>Luteolibacter</i> | 0.101     | 0.047       | 0          |

**Table S3** Relative abundance of bacterial families found in the substrate, and associated with the rhizosphere, roots, stem, leaves, spathe and spadix tissues of healthy *Anthurium andraeanum* L. plants.

| Taxon                                                      | Substrate                    | Rhizosphere     | Root            | Stem            | Leaf             | Spathe          | Spadix          |
|------------------------------------------------------------|------------------------------|-----------------|-----------------|-----------------|------------------|-----------------|-----------------|
|                                                            | Relative abundance (%)       |                 |                 |                 |                  |                 |                 |
| Other Bacteria                                             | 11.01<br>(0.62) <sup>a</sup> | 11.10<br>(1.26) | 11.93<br>(4.33) | 15.69<br>(6.79) | 27.74<br>(12.80) | 16.49<br>(4.58) | 23.52<br>(9.93) |
| <b>Acidobacteria</b>                                       |                              |                 |                 |                 |                  |                 |                 |
| Acidobacteria                                              | 0.07 (0.07)                  | 0               | 0               | 0               | 0                | 0               | 0               |
| Acidobacteria-5                                            | 0.25 (0.11)                  | 0.07 (0.03)     | 0               | 0               | 0                | 0               | 0               |
| Acidobacteria-6                                            | 0.13 (0.13)                  | 0               | 0               | 0               | 0                | 0               | 0               |
| Acidobacteria-6; BPC015                                    | 0.16 (0.09)                  | 0.35 (0.27)     | 0               | 0               | 0                | 0               | 0               |
| Acidobacteria-6; CCU21                                     | 0.35 (0.07)                  | 0.18 (0.09)     | 0               | 0               | 0                | 0               | 0               |
| Acidobacteria-6; iii1-15                                   | 0.03 (0.02)                  | 0.02 (0.01)     | 0               | 0               | 0                | 0               | 0               |
| Acidobacteria-6; iii1-15                                   | 4.83 (1.01)                  | 3.20 (0.41)     | 0               | 0               | 0                | 0               | 0               |
| Acidobacteria-6; iii1-15; RB40                             | 0.89 (0.30)                  | 0.04 (0.40)     | 0               | 0               | 0                | 0               | 0               |
| Acidobacteria-6; iii1-15; mb2424                           | 0.59 (0.12)                  | 0.40 (0.18)     | 0               | 0               | 0                | 0               | 0               |
| Acidobacteriia; Acidobacteriales                           | 0.05 (0.03)                  | 0.01 (0.01)     | 0               | 0               | 0                | 0               | 0               |
| Acidobacteriia; Acidobacteriales; Acidobacteriaceae        | 4.10 (2.02)                  | 4.37 (1.58)     | 0.22 (0.12)     | 0               | 0                | 0               | 0               |
| Acidobacteriia; Acidobacteriales; Koribacteraceae          | 0.29 (0.10)                  | 0.22 (0.13)     | 0               | 0               | 0                | 0               | 0               |
| BPC102; MVS-40                                             | 0.03 (0.03)                  | 0.02 (0.02)     | 0               | 0               | 0                | 0               | 0               |
| DA052; Ellin6513                                           | 0.02 (0.02)                  | 0.07 (0.03)     | 0               | 0               | 0                | 0               | 0               |
| EC1113                                                     | 0                            | 0.12 (0.06)     | 0               | 0               | 0                | 0               | 0               |
| PAUC37f                                                    | 0.03 (0.03)                  | 0.02 (0.02)     | 0               | 0               | 0                | 0               | 0               |
| RB25                                                       | 0.11 (0.08)                  | 0.03 (0.03)     | 0               | 0               | 0                | 0               | 0               |
| S035                                                       | 0.03 (0.03)                  | 0.02 (0.02)     | 0               | 0               | 0                | 0               | 0               |
| Solibacteres; Solibacterales                               | 0.11 (0.03)                  | 0.20 (0.07)     | 0               | 0               | 0                | 0               | 0               |
| Solibacteres; Solibacterales; PAUC26f                      | 0.03 (0.03)                  | 0.05 (0.05)     | 0               | 0               | 0                | 0               | 0               |
| Solibacteres; Solibacterales; Solibacteraceae              | 0.03 (0.02)                  | 0.03 (0.03)     | 0               | 0               | 0                | 0               | 0               |
| Sva0725; Sva0725                                           | 0.10 (0.07)                  | 0.20 (0.08)     | 0               | 0               | 0                | 0               | 0               |
| [Chloracidobacteria]; RB41                                 | 0.13 (0.04)                  | 0.06 (0.03)     | 0               | 0               | 0                | 0               | 0               |
| [Chloracidobacteria]; RB41; Ellin6075                      | 2.05 (0.45)                  | 2.23 (0.91)     | 0               | 0               | 0                | 0               | 0               |
| iii1-8; 32-20                                              | 0.05 (0.03)                  | 0               | 0               | 0               | 0                | 0               | 0               |
| iii1-8; DS-18                                              | 0                            | 0.12 (0.12)     | 0               | 0               | 0                | 0               | 0               |
| <b>Actinobacteria</b>                                      |                              |                 |                 |                 |                  |                 |                 |
| Acidimicrobiia; Acidimicrobiales                           | 0.89 (0.47)                  | 1.50 (0.89)     | 0               | 0               | 0                | 0               | 0               |
| Acidimicrobiia; Acidimicrobiales; C111                     | 0.16 (0.11)                  | 0.08 (0.05)     | 0               | 0               | 0                | 0               | 0               |
| Acidimicrobiia; Acidimicrobiales; EB1017                   | 0.34 (0.12)                  | 0.31 (0.11)     | 0               | 0               | 0                | 0               | 0               |
| Acidimicrobiia; Acidimicrobiales; koll13                   | 0.03 (0.03)                  | 0.01 (0.01)     | 0               | 0               | 0                | 0               | 0               |
| Actinobacteria; Actinomycetales                            | 0.68 (0.19)                  | 0.42 (0.07)     | 0.52 (0.42)     | 0               | 0                | 0               | 0               |
| Actinobacteria; Actinomycetales; Cellulomonadaceae         | 0                            | 0.02 (0.02)     | 0               | 0               | 0                | 0               | 0               |
| Actinobacteria; Actinomycetales; Microbacteriaceae         | 0.54 (0.06)                  | 0.49 (0.10)     | 1.82 (1.51)     | 0               | 0                | 0               | 0               |
| Actinobacteria; Actinomycetales; Micromonosporaceae        | 0.08 (0.04)                  | 0.18 (0.09)     | 0.77 (0.65)     | 0               | 0                | 0               | 0               |
| Actinobacteria; Actinomycetales; Mycobacteriaceae          | 0.43 (0.14)                  | 0.30 (0.12)     | 0               | 0               | 0                | 0               | 0               |
| Actinobacteria; Actinomycetales; Nakamurellaceae           | 0.06 (0.04)                  | 0               | 0               | 0               | 0                | 0               | 0               |
| Actinobacteria; Actinomycetales; Nocardiodaceae            | 0.38 (0.25)                  | 0.27 (0.11)     | 0               | 0               | 0                | 0               | 0               |
| Actinobacteria; Actinomycetales; Nocardiosporaceae         | 0                            | 0.02 (0.02)     | 0               | 0               | 0                | 0               | 0               |
| Actinobacteria; Actinomycetales; Promicromonosporaceae     | 0.03 (0.03)                  | 0.01 (0.01)     | 0               | 0               | 0                | 0               | 0               |
| Actinobacteria; Actinomycetales; Propionibacteriaceae      | 0.02 (0.02)                  | 0.15 (0.14)     | 0.65 (0.45)     | 1.05 (0.65)     | 0                | 0.48 (0.28)     | 0               |
| Actinobacteria; Actinomycetales; Pseudonocardiaceae        | 0.07 (0.06)                  | 0.02 (0.02)     | 0               | 0               | 0                | 0               | 0               |
| Actinobacteria; Actinomycetales; Streptomyces              | 0.07 (0.06)                  | 0.28 (0.19)     | 3.22 (2.20)     | 0               | 0                | 0               | 0               |
| Actinobacteria; Actinomycetales; Williamsiaceae            | 0.02 (0.02)                  | 0.02 (0.02)     | 0               | 0               | 0                | 0               | 0               |
| MB-A2-108                                                  | 0                            | 0.02 (0.02)     | 0               | 0               | 0                | 0               | 0               |
| MB-A2-108; 0319-7L14;                                      | 0.04 (0.03)                  | 0.11 (0.07)     | 0               | 0               | 0                | 0               | 0               |
| Thermoleophilia; Gaiellales; Gaiellaceae                   | 1.33 (0.62)                  | 1.65 (0.67)     | 0               | 0               | 0                | 0               | 0               |
| Thermoleophilia; Solirubrobacterales                       | 0.30 (0.11)                  | 0.27 (0.11)     | 0               | 0               | 0                | 0               | 0               |
| Thermoleophilia; Solirubrobacterales; Conexibacteraceae    | 0.13 (0.06)                  | 0.12 (0.07)     | 0               | 0               | 0                | 0               | 0               |
| Thermoleophilia; Solirubrobacterales; Patulibacteraceae    | 0.04 (0.03)                  | 0.02 (0.02)     | 0               | 0               | 0                | 0               | 0               |
| Thermoleophilia; Solirubrobacterales; Solirubrobacteraceae | 0                            | 0.04 (0.03)     | 0               | 0               | 0                | 0               | 0               |
| <b>Bacteroidetes</b>                                       |                              |                 |                 |                 |                  |                 |                 |
| Cytophagia; Cytophagales; Cytophagaceae                    | 0.93 (0.38)                  | 1.26 (0.14)     | 3.10 (1.90)     | 0               | 0                | 0               | 0               |
| Flavobacteriia; Flavobacteriales                           | 0.02 (0.02)                  | 0               | 0               | 0               | 0                | 0               | 0               |
| Flavobacteriia; Flavobacteriales; Cryomorphaeae            | 0.04 (0.03)                  | 0.01 (0.01)     | 0               | 0               | 0                | 0               | 0               |
| Flavobacteriia; Flavobacteriales; Flavobacteriaceae        | 0.39 (0.15)                  | 0.36 (0.18)     | 4.36 (2.84)     | 0               | 0                | 0               | 0               |
| Sphingobacteriia; Sphingobacteriales;                      | 0.25 (0.15)                  | 0.03 (0.03)     | 0               | 0               | 0                | 0               | 0               |

Table S3 (continued)

| Taxon                                                     | Substrate   | Rhizosphere | Root        | Stem         | Leave       | Spathe       | Spadix       |
|-----------------------------------------------------------|-------------|-------------|-------------|--------------|-------------|--------------|--------------|
| Sphingobacteriia; Sphingobacteriales; Sphingobacteriaceae | 0.05 (0.05) | 0           | 0           | 0            | 0           | 0            | 0            |
| [Saprospirae]; [Saprospirales]; Chitinophagaceae          | 1.59 (0.33) | 1.46 (0.44) | 0           | 0            | 0           | 0            | 0            |
| [Saprospirae]; [Saprospirales]; Saprospiraceae            | 0.05 (0.03) | 0.04 (0.04) | 0           | 0            | 0           | 0            | 0            |
| <b>Chloroflexi</b>                                        |             |             |             |              |             |              |              |
| Chloroflexi                                               | 0.02 (0.02) | 0.14 (0.07) | 0           | 0            | 0           | 0            | 0            |
| Anaerolineae; A31; S47                                    | 0.04 (0.03) | 0.05 (0.04) | 0           | 0            | 0           | 0            | 0            |
| Anaerolineae; CFB-26                                      | 0.04 (0.03) | 0           | 0           | 0            | 0           | 0            | 0            |
| Anaerolineae; Caldilineales; Caldilineaceae               | 0.15 (0.15) | 0.11 (0.11) | 0           | 0            | 0           | 0            | 0            |
| Anaerolineae; DRC31                                       | 0.01 (0.01) | 0.29 (0.18) | 0           | 0            | 0           | 0            | 0            |
| Anaerolineae; GCA004                                      | 0.03 (0.03) | 0.14 (0.08) | 0           | 0            | 0           | 0            | 0            |
| Anaerolineae; H39                                         | 0.08 (0.05) | 0           | 0           | 0            | 0           | 0            | 0            |
| Anaerolineae; S0208                                       | 0.20 (0.14) | 0.10 (0.04) | 0           | 0            | 0           | 0            | 0            |
| Anaerolineae; SBR1031; A4b                                | 0.26 (0.09) | 0.17 (0.08) | 0           | 0            | 0           | 0            | 0            |
| Anaerolineae; envOPS12                                    | 0.04 (0.03) | 0.09 (0.03) | 0           | 0            | 0           | 0            | 0            |
| Chloroflexi; [Roseiflexales]                              | 0.01 (0.01) | 0.06 (0.04) | 0           | 0            | 0           | 0            | 0            |
| Ellin6529                                                 | 0.85 (0.40) | 1.41 (0.35) | 0           | 0            | 0           | 0            | 0            |
| Gitt-GS-136                                               | 0.55 (0.24) | 0.36 (0.14) | 0           | 0            | 0           | 0            | 0            |
| Ktedonobacteria                                           | 0           | 0.06 (0.06) | 0           | 0            | 0           | 0            | 0            |
| Ktedonobacteria; JG30-KF-AS9                              | 0.03 (0.03) | 0.06 (0.06) | 0           | 0            | 0           | 0            | 0            |
| S085                                                      | 1.51 (0.31) | 1.33 (0.42) | 0           | 0            | 0           | 0            | 0            |
| SAR202                                                    | 0           | 0.10 (0.10) | 0           | 0            | 0           | 0            | 0            |
| TK10                                                      | 0           | 0.05 (0.03) | 0           | 0            | 0           | 0            | 0            |
| TK10; AKYG885; 5B-12                                      | 0.09 (0.06) | 0.07 (0.07) | 0           | 0            | 0           | 0            | 0            |
| TK10; B07_WMSP1                                           | 0.03 (0.03) | 0.02 (0.01) | 0           | 0            | 0           | 0            | 0            |
| TK10; B07_WMSP1                                           | 0.05 (0.03) | 0.06 (0.06) | 0           | 0            | 0           | 0            | 0            |
| TK17                                                      | 0.41 (0.17) | 0.22 (0.00) | 0           | 0            | 0           | 0            | 0            |
| TK17; mle1-48                                             | 0.54 (0.19) | 0.85 (0.30) | 0           | 0            | 0           | 0            | 0            |
| Thermomicrobia; AKYG1722                                  | 0.06 (0.06) | 0.03 (0.02) | 0           | 0            | 0           | 0            | 0            |
| <b>Firmicutes</b>                                         |             |             |             |              |             |              |              |
| Bacilli; Bacillales                                       | 0.11 (0.06) | 0.28 (0.03) | 0           | 0            | 0           | 0            | 0            |
| Bacilli; Bacillales; Alicyclobacillaceae                  | 0.09 (0.09) | 0.01 (0.01) | 0           | 0            | 0           | 0            | 0.77 (0.57)  |
| Bacilli; Bacillales; Bacillaceae                          | 1.36 (0.75) | 1.07 (0.42) | 0           | 0            | 0           | 0            | 0            |
| Bacilli; Bacillales; Paenibacillaceae                     | 0.20 (0.10) | 0.15 (0.06) | 2.77 (0.91) | 2.05 (1.26)  | 6.25 (4.84) | 10.17 (3.90) | 11.73 (3.66) |
| Bacilli; Bacillales; Planococcaceae                       | 0.26 (0.15) | 0.21 (0.10) | 0           | 0            | 0           | 0            | 0            |
| Bacilli; Bacillales; Thermoactinomycetaceae               | 0.51 (0.25) | 0.27 (0.12) | 0           | 0            | 0           | 0            | 0            |
| Bacilli; Haloplasmatales; Haloplasmataceae                | 0           | 0           | 0           | 0            | 0           | 1.90 (1.90)  | 0            |
| Bacilli; Lactobacillales; Aerococcaceae                   | 0           | 0           | 0.23 (0.23) | 0            | 5.00 (3.00) | 1.68 (1.18)  | 2.93 (1.59)  |
| Clostridia                                                | 0.02 (0.02) | 0           | 0           | 0            | 0           | 0            | 0            |
| Clostridia; Clostridiales                                 | 0           | 0           | 0           | 0            | 0           | 0            | 0.83 (0.36)  |
| Clostridia; Clostridiales; Clostridiaceae                 | 0.23 (0.14) | 0.07 (0.07) | 0.77 (0.57) | 4.72 (2.64)  | 5.80 (4.40) | 1.69 (1.25)  | 3.16 (1.64)  |
| Clostridia; Clostridiales; Lachnospiraceae                | 0           | 0           | 4.51 (2.03) | 6.13 (3.67)  | 2.78 (1.87) | 17.12 (5.23) | 8.62 (3.16)  |
| Clostridia; Clostridiales; Peptostreptococcaceae          | 0.02 (0.02) | 0.16 (0.11) | 3.90 (3.02) | 10.00 (3.10) | 0           | 0.48 (0.28)  | 9.37 (5.67)  |
| Clostridia; Clostridiales; Veillonellaceae                | 0           | 0           | 1.20 (0.78) | 4.21 (2.78)  | 0           | 4.55 (1.67)  | 3.62 (1.63)  |
| <b>Planctomycetes</b>                                     |             |             |             |              |             |              |              |
| Phycisphaerae; CCM11a                                     | 0           | 0.06 (0.06) | 0           | 0            | 0           | 0            | 0            |
| Phycisphaerae; Cpla-3                                     | 0.42 (0.22) | 0.41 (0.16) | 0           | 0            | 0           | 0            | 0            |
| Phycisphaerae; Phycisphaerales                            | 0.20 (0.16) | 0.10 (0.10) | 0           | 0            | 0           | 0            | 0            |
| Phycisphaerae; Pla1                                       | 0.08 (0.08) | 0.03 (0.02) | 0           | 0            | 0           | 0            | 0            |
| Phycisphaerae; S-70                                       | 0.07 (0.07) | 0.02 (0.02) | 0           | 0            | 0           | 0            | 0            |
| Phycisphaerae; WD2101                                     | 0.53 (0.16) | 0.27 (0.03) | 0           | 0            | 0           | 0            | 0            |
| Planctomycetia; Gemmatales; Isosphaeraceae                | 0           | 0.10 (0.10) | 0           | 0            | 0           | 0            | 0            |
| Planctomycetia; Pirellulales; Pirellulaceae               | 0.29 (0.10) | 0.21 (0.09) | 0           | 0            | 0           | 0            | 0            |
| Planctomycetia; Planctomycetales; Planctomycetaceae       | 0           | 0.10 (0.10) | 0           | 0            | 0           | 0            | 0            |
| vadinHA49; DH61                                           | 0.05 (0.05) | 0           | 0           | 0            | 0           | 0            | 0            |
| <b>Alphaproteobacteria</b>                                |             |             |             |              |             |              |              |
| Proteobacteria                                            | 0.30 (0.19) | 0.32 (0.17) | 0.43 (0.43) | 0            | 0.63 (0.31) | 0.65 (0.56)  | 0            |
| Proteobacteria; Alphaproteobacteria                       | 1.92 (0.37) | 2.24 (0.21) | 0.47 (0.35) | 0            | 0           | 0            | 0            |
| BD7-3                                                     | 0.03 (0.03) | 0.04 (0.03) | 0           | 0            | 0           | 0            | 0            |
| Caulobacteriales; Caulobacteraceae                        | 0.90 (0.29) | 1.34 (0.46) | 1.18 (1.18) | 0            | 0           | 0.95 (0.48)  | 0            |
| Ellin329                                                  | 0.11 (0.03) | 0.13 (0.08) | 0           | 0            | 0           | 0            | 0            |
| Kiloniellales                                             | 0.02 (0.02) | 0.02 (0.02) | 0           | 0            | 0           | 0            | 0            |

Table S3 (continued)

| Taxon                                     | Substrate    | Rhizosphere  | Root         | Stem         | Leave         | Spathe       | Spadix       |
|-------------------------------------------|--------------|--------------|--------------|--------------|---------------|--------------|--------------|
| Rhizobiales                               | 3.19 (0.48)  | 2.92 (0.55)  | 0            | 0            | 0             | 0            | 0            |
| Rhizobiales; Beijerinckiaceae             | 0.07 (0.07)  | 0.07 (0.05)  | 0            | 0            | 0             | 0            | 0            |
| Rhizobiales; Bradyrhizobiaceae            | 1.06 (0.22)  | 0.52 (0.07)  | 0.49 (0.30)  | 0            | 0             | 0            | 0            |
| Rhizobiales; Hyphomicrobiaceae            | 10.38 (2.08) | 12.32 (2.39) | 1.68 (0.75)  | 0            | 0             | 0            | 0            |
| Rhizobiales; Methylobacteriaceae          | 0.21 (0.04)  | 0.16 (0.06)  | 0            | 0            | 0             | 0            | 0            |
| Rhizobiales; Methylocystaceae             | 0.19 (0.09)  | 0.07 (0.03)  | 0            | 0            | 0             | 0            | 0            |
| Rhizobiales; Phyllobacteriaceae           | 0.57 (0.17)  | 0.55 (0.14)  | 0            | 0            | 0             | 0            | 0            |
| Rhizobiales; Rhizobiaceae                 | 0.06 (0.03)  | 0.49 (0.12)  | 0.88 (0.39)  | 0            | 0             | 2.61 (1.43)  | 0            |
| Rhizobiales; Rhodobiaceae                 | 0.08 (0.05)  | 0.04 (0.03)  | 0            | 0            | 0             | 0            | 0            |
| Rhizobiales; Xanthobacteraceae            | 0.07 (0.07)  | 0.07 (0.07)  | 0            | 0            | 0             | 0            | 0            |
| Rhodobacterales; Hyphomonadaceae          | 0.19 (0.07)  | 0.24 (0.17)  | 0            | 0            | 0             | 0            | 0            |
| Rhodobacterales; Rhodobacteraceae         | 0.05 (0.03)  | 0.23 (0.20)  | 0            | 0            | 0             | 0            | 0            |
| Rhodospirillales                          | 0.10 (0.07)  | 0.04 (0.02)  | 0            | 0            | 0             | 0            | 0            |
| Rhodospirillales; Acetobacteraceae        | 0.46 (0.20)  | 0.57 (0.30)  | 0            | 0.48 (0.48)  | 0             | 0            | 0            |
| Rhodospirillales; Rhodospirillaceae       | 7.31 (1.38)  | 6.36 (0.85)  | 0.95 (0.59)  | 0            | 0             | 0            | 0            |
| Sphingomonadales                          | 0.39 (0.11)  | 0.16 (0.08)  | 0            | 0            | 0             | 0            | 0            |
| Sphingomonadales; Erythrobacteraceae      | 0.47 (0.11)  | 0.52 (0.26)  | 0            | 0            | 0             | 0            | 0            |
| Sphingomonadales; Sphingomonadaceae       | 0.49 (0.25)  | 0.51 (0.11)  | 0            | 0            | 0             | 0            | 0            |
| <b>Betaproteobacteria</b>                 |              |              |              |              |               |              |              |
| Proteobacteria; Betaproteobacteria        | 1.41 (0.31)  | 1.24 (0.42)  | 0            | 0            | 0             | 0            | 0            |
| Burkholderiales                           | 0.03 (0.03)  | 0.14 (0.10)  | 0            | 0            | 0             | 0            | 0            |
| Burkholderiales; Alcaligenaceae           | 0.15 (0.07)  | 0.15 (0.13)  | 9.15 (6.67)  | 2.92 (1.26)  | 0             | 0.40 (0.20)  | 1.96 (1.49)  |
| Burkholderiales; Burkholderiaceae         | 0.66 (0.21)  | 1.10 (0.32)  | 0            | 0            | 0             | 0            | 0            |
| Burkholderiales; Comamonadaceae           | 0.94 (0.47)  | 0.81 (0.23)  | 0.39 (0.17)  | 3.81 (1.82)  | 0.63 (0.33)   | 0            | 0.42 (0.22)  |
| Burkholderiales; Oxalobacteraceae         | 0.15 (0.07)  | 0.15 (0.09)  | 0.52 (0.21)  | 2.38 (1.82)  | 0             | 0            | 0            |
| Ellin6067                                 | 0.11 (0.04)  | 0.03 (0.02)  | 0            | 0            | 0             | 0            | 0            |
| IS-44                                     | 0.07 (0.07)  | 0.03 (0.03)  | 0            | 0            | 0             | 0            | 0            |
| MND1                                      | 0.44 (0.17)  | 0.44 (0.20)  | 0            | 0            | 0             | 0            | 0            |
| Nitrosomonadales; Nitrosomonadaceae       | 0.10 (0.04)  | 0.07 (0.06)  | 0            | 0            | 0             | 0            | 0            |
| Rhodocyclales; Rhodocyclaceae             | 0.08 (0.08)  | 0.02 (0.02)  | 0.65 (0.45)  | 0            | 0             | 0.40 (0.20)  | 0            |
| SC-I-84                                   | 0.47 (0.12)  | 0.56 (0.25)  | 0            | 0            | 0             | 0            | 0            |
| <b>Deltaproteobacteria</b>                |              |              |              |              |               |              |              |
| Proteobacteria; Deltaproteobacteria       | 0.01 (0.01)  | 0.16 (0.08)  | 0            | 0            | 0             | 0            | 0            |
| Bdellovibrionales; Bdellovibrionaceae     | 0            | 0.02 (0.02)  | 0            | 0            | 0             | 0            | 0            |
| DTB120                                    | 0.03 (0.03)  | 0            | 0            | 0            | 0             | 0            | 0            |
| MIZ46                                     | 0.09 (0.05)  | 0.08 (0.04)  | 0            | 0            | 0             | 0            | 0            |
| Myxococcales                              | 0.16 (0.04)  | 0.27 (0.15)  | 0            | 0            | 0             | 0            | 0            |
| Myxococcales; Haliangiaceae               | 0.10 (0.05)  | 0.04 (0.02)  | 0            | 0            | 0             | 0            | 0            |
| Myxococcales; Nannocystaceae              | 0            | 0.15 (0.10)  | 0            | 0            | 0             | 0            | 0            |
| Myxococcales; OM27                        | 0.17 (0.09)  | 0.05 (0.03)  | 0            | 0            | 0             | 0            | 0            |
| Myxococcales; Polyangiaceae               | 0.05 (0.05)  | 0.02 (0.02)  | 0            | 0            | 0             | 0            | 0            |
| NB1-j; MND4                               | 0.09 (0.03)  | 0.08 (0.03)  | 0            | 0            | 0             | 0            | 0            |
| NB1-j; NB1-i                              | 0.03 (0.03)  | 0.02 (0.02)  | 0            | 0            | 0             | 0            | 0            |
| Spirobacillales                           | 0            | 0.02 (0.02)  | 0            | 0            | 0             | 0            | 0            |
| Syntrophobacterales; Syntrophobacteraceae | 1.12 (0.32)  | 1.91 (0.32)  | 0            | 0            | 0             | 0            | 0            |
| <b>Gammaproteobacteria</b>                |              |              |              |              |               |              |              |
| Proteobacteria; Gammaproteobacteria       | 0.51 (0.18)  | 0.38 (0.16)  | 0            | 0            | 0             | 0            | 0            |
| Aeromonadales; Aeromonadaceae             | 0.09 (0.09)  | 0.01 (0.01)  | 0            | 0            | 0             | 0            | 0            |
| Alteromonadales                           | 0.35 (0.20)  | 0.23 (0.10)  | 0            | 0            | 0             | 0            | 0            |
| Alteromonadales; 125ds10                  | 0.13 (0.10)  | 0.11 (0.11)  | 0            | 0            | 0             | 0            | 0            |
| Alteromonadales; OM60                     | 0.33 (0.24)  | 0.30 (0.10)  | 0            | 0            | 0             | 0            | 0            |
| Chromatiales                              | 0.01 (0.01)  | 0.01 (0.01)  | 0            | 0            | 0             | 0            | 0            |
| Enterobacteriales; Enterobacteriaceae     | 0.03 (0.02)  | 0.01 (0.01)  | 5.71 (2.91)  | 0            | 0             | 0            | 0.42 (0.22)  |
| HTCC2188; HTCC2089                        | 0.10 (0.05)  | 0.35 (0.08)  | 0            | 0            | 0             | 0            | 0            |
| Legionellales                             | 0.11 (0.03)  | 0.22 (0.06)  | 0            | 0            | 0             | 0            | 0            |
| Legionellales; Coxiellaceae               | 0.36 (0.12)  | 0.28 (0.06)  | 0            | 0            | 0             | 0            | 0            |
| Legionellales; Legionellaceae             | 0.03 (0.03)  | 0.08 (0.07)  | 0            | 0            | 0             | 0            | 0            |
| Oceanospirillales; Halomonadaceae         | 0.39 (0.09)  | 0.41 (0.15)  | 0.68 (0.36)  | 0            | 0.63 (0.43)   | 1.12 (0.70)  | 0            |
| Pseudomonadales; Moraxellaceae            | 0.50 (0.37)  | 0.04 (0.04)  | 9.05 (4.79)  | 0.48 (0.48)  | 7.50 (3.11)   | 4.45 (3.70)  | 0            |
| Pseudomonadales; Pseudomonadaceae         | 0.50 (0.03)  | 0.40 (0.21)  | 15.70 (6.42) | 44.01 (9.37) | 40.33 (10.76) | 30.56 (5.35) | 31.85 (4.94) |
| Thiotrichales; Piscirickettsiaceae        | 0.47 (0.07)  | 0.39 (0.22)  | 0            | 0            | 0             | 0            | 0            |
| Xanthomonadales; Sinobacteraceae          | 2.21 (0.53)  | 1.91 (0.34)  | 0.77 (0.57)  | 0            | 0             | 0            | 0            |
| Xanthomonadales; Xanthomonadaceae         | 4.43 (1.95)  | 3.64 (1.15)  | 4.76 (2.21)  | 2.07 (0.97)  | 2.73 (1.68)   | 0            | 0.80 (0.49)  |
| [Marinicellales]; [Marinicellaceae]       | 0.08 (0.08)  | 0            | 0            | 0            | 0             | 0            | 0            |

Table S3 (continued)

| Taxon                                                                           | Substrate   | Rhizosphere | Root        | Stem | Leave | Spathe      | Spadix |
|---------------------------------------------------------------------------------|-------------|-------------|-------------|------|-------|-------------|--------|
| <b>Other Phyla</b>                                                              |             |             |             |      |       |             |        |
| Armatimonadetes; 0319-6E2                                                       | 0.02 (0.02) | 0           | 0           | 0    | 0     | 0           | 0      |
| Armatimonadetes; [Fimbriimonadia]; [Fimbriimonadales]                           | 0.01 (0.01) | 0.01 (0.01) | 0           | 0    | 0     | 0           | 0      |
| Armatimonadetes; [Fimbriimonadia]; [Fimbriimonadales]                           | 0           | 0.19 (0.07) | 0           | 0    | 0     | 0           | 0      |
| Armatimonadetes; [Fimbriimonadia]; [Fimbriimonadales]; [Fimbriimonadaceae]      | 0.85 (0.22) | 0.75 (0.35) | 0           | 0    | 0     | 2.40 (1.40) | 0      |
| BRC1; NPL-UPA2                                                                  | 0.02 (0.02) | 0.02 (0.02) | 0           | 0    | 0     | 0           | 0      |
| BRC1; PRR-11                                                                    | 0.03 (0.03) | 0           | 0           | 0    | 0     | 0           | 0      |
| Chlorobi                                                                        | 0.04 (0.03) | 0.07 (0.07) | 0           | 0    | 0     | 0           | 0      |
| Chlorobi; Ignavibacteria; Ignavibacteriales; Ignavibacteriaceae                 | 0.19 (0.09) | 0.29 (0.15) | 0           | 0    | 0     | 0           | 0      |
| Chlorobi; OPB56                                                                 | 0.01 (0.01) | 0.08 (0.07) | 0           | 0    | 0     | 0           | 0      |
| Chlorobi; SJA-28                                                                | 0.12 (0.04) | 0.17 (0.11) | 0           | 0    | 0     | 0           | 0      |
| Cyanobacteria                                                                   | 0           | 0           | 0           | 0    | 0     | 1.90 (1.00) | 0      |
| Cyanobacteria; 4C0d-2; MLE1-12                                                  | 0.04 (0.04) | 0.06 (0.06) | 0           | 0    | 0     | 0           | 0      |
| Cyanobacteria; 4C0d-2; SM1D11                                                   | 0           | 0.08 (0.06) | 0           | 0    | 0     | 0           | 0      |
| Elusimicrobia; Elusimicrobia; IIb                                               | 0           | 0.03 (0.03) | 0           | 0    | 0     | 0           | 0      |
| GN02; GKS2-174                                                                  | 0           | 0.02 (0.02) | 0           | 0    | 0     | 0           | 0      |
| GN04; GN15                                                                      | 0.04 (0.04) | 0.05 (0.03) | 0           | 0    | 0     | 0           | 0      |
| GOUTA4                                                                          | 0.05 (0.03) | 0           | 0           | 0    | 0     | 0           | 0      |
| Gemmatimonadetes; Gemm-1                                                        | 0.83 (0.28) | 1.20 (0.35) | 0           | 0    | 0     | 0           | 0      |
| Gemmatimonadetes; Gemm-2                                                        | 0.01 (0.01) | 0.03 (0.02) | 0           | 0    | 0     | 0           | 0      |
| Gemmatimonadetes; Gemm-3                                                        | 0           | 0.05 (0.03) | 0           | 0    | 0     | 0           | 0      |
| Gemmatimonadetes; Gemm-5                                                        | 0.11 (0.07) | 0.03 (0.02) | 0           | 0    | 0     | 0           | 0      |
| Gemmatimonadetes; Gemmatimonadetes                                              | 0.55 (0.19) | 0.25 (0.14) | 0           | 0    | 0     | 0           | 0      |
| Gemmatimonadetes; Gemmatimonadetes; Ellin5290                                   | 0.03 (0.02) | 0.07 (0.07) | 0           | 0    | 0     | 0           | 0      |
| Gemmatimonadetes; Gemmatimonadetes; N1423WL                                     | 0.10 (0.07) | 0.13 (0.07) | 0           | 0    | 0     | 0           | 0      |
| Kazan-3B-28                                                                     | 0.03 (0.03) | 0           | 0           | 0    | 0     | 0           | 0      |
| MVP-21                                                                          | 0.14 (0.06) | 0.24 (0.12) | 0           | 0    | 0     | 0           | 0      |
| NKB19                                                                           | 0.03 (0.03) | 0.18 (0.13) | 0           | 0    | 0     | 0           | 0      |
| Nitrospirae; Nitrospira; Nitrospirales; 0319-6A21                               | 0.11 (0.08) | 0.05 (0.05) | 0           | 0    | 0     | 0           | 0      |
| Nitrospirae; Nitrospira; Nitrospirales; Nitrospiraceae                          | 1.34 (0.44) | 0.96 (0.25) | 0           | 0    | 0     | 0           | 0      |
| OD1                                                                             | 0.03 (0.03) | 0           | 0           | 0    | 0     | 0           | 0      |
| OD1; ABY1                                                                       | 0.27 (0.20) | 0.06 (0.06) | 0           | 0    | 0     | 0           | 0      |
| OD1; SM2F11                                                                     | 0.10 (0.05) | 0.14 (0.06) | 0           | 0    | 0     | 0           | 0      |
| OD1; ZB2                                                                        | 0.07 (0.05) | 0.04 (0.03) | 0           | 0    | 0     | 0           | 0      |
| OP11                                                                            | 0.24 (0.07) | 0.15 (0.10) | 0           | 0    | 0     | 0           | 0      |
| OP11; OP11-4                                                                    | 0.03 (0.03) | 0.04 (0.03) | 0           | 0    | 0     | 0           | 0      |
| OP11; WCHB1-64                                                                  | 0.02 (0.02) | 0           | 0           | 0    | 0     | 0           | 0      |
| SBR1093; VHS-B5-50                                                              | 0.21 (0.09) | 0.04 (0.03) | 0           | 0    | 0     | 0           | 0      |
| TM6; SJA-4                                                                      | 0.34 (0.11) | 0.24 (0.07) | 0           | 0    | 0     | 0           | 0      |
| TM6; SJA-4; YJF2-48                                                             | 0.02 (0.02) | 0.04 (0.04) | 0           | 0    | 0     | 0           | 0      |
| TM7                                                                             | 0.26 (0.20) | 0.34 (0.34) | 0           | 0    | 0     | 0           | 0      |
| TM7; TM7-1                                                                      | 3.34 (0.76) | 3.52 (0.62) | 0           | 0    | 0     | 0           | 0      |
| TM7; TM7-3                                                                      | 0.03 (0.03) | 0.07 (0.07) | 0           | 0    | 0     | 0           | 0      |
| TM7; TM7-3                                                                      | 0           | 0           | 1.04 (0.56) | 0    | 0     | 0           | 0      |
| Tenericutes; Mollicutes; Anaeroplasmatales; Anaeroplasmataceae                  | 0           | 0           | 4.13 (3.15) | 0    | 0     | 0           | 0      |
| Verrucomicrobia; Opiritae; Opiritales; Opiritaceae                              | 0.03 (0.02) | 0.12 (0.06) | 0           | 0    | 0     | 0           | 0      |
| Verrucomicrobia; Verrucomicrobiae; Verrucomicrobiales; Verrucomicrobiaceae      | 0.09 (0.09) | 0.12 (0.05) | 0           | 0    | 0     | 0           | 0      |
| Verrucomicrobia; [Pedosphaerae]; [Pedosphaerales]                               | 0.03 (0.02) | 0.08 (0.06) | 0           | 0    | 0     | 0           | 0      |
| Verrucomicrobia; [Pedosphaerae]; [Pedosphaerales]; auto67_4W                    | 0.17 (0.12) | 0.04 (0.03) | 0           | 0    | 0     | 0           | 0      |
| Verrucomicrobia; [Spartobacteria]; [Chthoniobacteriales]; [Chthoniobacteraceae] | 0.03 (0.03) | 0.06 (0.06) | 0           | 0    | 0     | 0           | 0      |
| WPS-2                                                                           | 0.17 (0.08) | 0.11 (0.06) | 0           | 0    | 0     | 0           | 0      |
| WS2; SHA-109                                                                    | 0.04 (0.03) | 0.05 (0.03) | 0           | 0    | 0     | 0           | 0      |
| WS3; PRR-12; GN03; KSB4                                                         | 0.03 (0.03) | 0.01 (0.01) | 0           | 0    | 0     | 0           | 0      |
| WS3; PRR-12; LD1-PA13                                                           | 0.06 (0.04) | 0.22 (0.10) | 0           | 0    | 0     | 0           | 0      |
| WS3; PRR-12; Sediment-1                                                         | 0.11 (0.08) | 0.40 (0.17) | 0           | 0    | 0     | 0           | 0      |
| WS3; PRR-12; Sediment-1; CV106                                                  | 0           | 0.02 (0.02) | 0           | 0    | 0     | 0           | 0      |

<sup>a</sup> Numbers in parenthesis are the standard errors ( $n = 5$ )

**Table S4** Relative abundance of bacterial genera found in the substrate, and associated with the rhizosphere, roots, stem, leaves, spathe and spadix tissues of healthy *Anthurium andraeanum* L. plants.

| Taxon                                                                        | Substrate                | Rhizosphere | Root        | Stem        | Leaves      | Spathe       | Spadix       | Relative abundance (%) |   |
|------------------------------------------------------------------------------|--------------------------|-------------|-------------|-------------|-------------|--------------|--------------|------------------------|---|
|                                                                              |                          |             |             |             |             |              |              |                        |   |
| <b>Acidobacteria</b>                                                         |                          |             |             |             |             |              |              |                        |   |
| Solibacteres; Solibacterales; Solibacteraceae; Candidatus <i>Solibacter</i>  | 0.02 (0.02) <sup>a</sup> | 0           | 0           | 0           | 0           | 0            | 0            | 0                      | 0 |
| <b>Actinobacteria</b>                                                        |                          |             |             |             |             |              |              |                        |   |
| Actinomycetales; Cellulomonadaceae; <i>Demequina</i>                         | 0                        | 0.02 (0.02) | 0           | 0           | 0           | 0            | 0            | 0                      | 0 |
| Actinomycetales; Microbacteriaceae; <i>Agromyces</i>                         | 0.11 (0.08)              | 0.04 (0.02) | 0           | 0           | 0           | 0            | 0            | 0                      | 0 |
| Actinomycetales; Microbacteriaceae; <i>Cryocolla</i>                         | 0.08 (0.04)              | 0.01 (0.01) | 0           | 0           | 0           | 0            | 0            | 0                      | 0 |
| Actinomycetales; Microbacteriaceae; <i>Microbacterium</i>                    | 0.06 (0.03)              | 0.09 (0.07) | 1.82 (1.51) | 0           | 0           | 0            | 0            | 0                      | 0 |
| Actinomycetales; Mycobacteriaceae; <i>Mycobacterium</i>                      | 0.43 (0.14)              | 0.30 (0.12) | 0           | 0           | 0           | 0            | 0            | 0                      | 0 |
| Actinomycetales; Nocardioideae; <i>Nocardioides</i>                          | 0.33 (0.22)              | 0.25 (0.11) | 0           | 0           | 0           | 0            | 0            | 0                      | 0 |
| Actinomycetales; Nocardiosporaceae; <i>Thermobifida</i>                      | 0                        | 0.02 (0.02) | 0           | 0           | 0           | 0            | 0            | 0                      | 0 |
| Actinomycetales; Promicromonosporaceae; <i>Xylanimicrobium</i>               | 0.03 (0.03)              | 0.01 (0.01) | 0           | 0           | 0           | 0            | 0            | 0                      | 0 |
| Actinomycetales; Propionibacteriaceae; <i>Propionibacterium</i>              | 0                        | 0.14 (0.14) | 0.65 (0.45) | 1.05 (0.65) | 0           | 0            | 0.48 (0.28)  | 0                      | 0 |
| Actinomycetales; Pseudonocardiaceae; <i>Saccharomonospora</i>                | 0.01 (0.01)              | 0.02 (0.02) | 0           | 0           | 0           | 0            | 0            | 0                      | 0 |
| Actinomycetales; Streptomycetaceae; <i>Streptomyces</i>                      | 0                        | 0.28 (0.19) | 3.22 (2.20) | 0           | 0           | 0            | 0            | 0                      | 0 |
| Actinomycetales; Williamsiaceae; <i>Williamsia</i>                           | 0.02 (0.02)              | 0.02 (0.02) | 0           | 0           | 0           | 0            | 0            | 0                      | 0 |
| Thermoleophilia; Solirubrobacterales; Conexibacteraceae; <i>Conexibacter</i> | 0.13 (0.06)              | 0.12 (0.07) | 0           | 0           | 0           | 0            | 0            | 0                      | 0 |
| <b>Bacteroidetes</b>                                                         |                          |             |             |             |             |              |              |                        |   |
| Cytophagia; Cytophagales; Cytophagaceae; <i>Adhaeribacter</i>                | 0.08 (0.07)              | 0.18 (0.14) | 0           | 0           | 0           | 0            | 0            | 0                      | 0 |
| Flavobacteriia; Flavobacteriales; Flavobacteriaceae; <i>Flavobacterium</i>   | 0.39 (0.15)              | 0.36 (0.18) | 4.36 (2.84) | 0           | 0           | 0            | 0            | 0                      | 0 |
| Sphingobacteriia; Sphingobacteriales; Sphingobacteriaceae; <i>Solitalea</i>  | 0.05 (0.05)              | 0           | 0           | 0           | 0           | 0            | 0            | 0                      | 0 |
| [Saprosirae]; [Saprosirales]; Chitinophagaceae; <i>Flaviumibacter</i>        | 0.03 (0.03)              | 0.02 (0.02) | 0           | 0           | 0           | 0            | 0            | 0                      | 0 |
| [Saprosirae]; [Saprosirales]; Chitinophagaceae; <i>Flavisolibacter</i>       | 0                        | 0.02 (0.02) | 0           | 0           | 0           | 0            | 0            | 0                      | 0 |
| <b>Chloroflexi</b>                                                           |                          |             |             |             |             |              |              |                        |   |
| Anaerolineae; Caldilineales; Caldilineaceae; <i>Caldilinea</i>               | 0                        | 0.02 (0.02) | 0           | 0           | 0           | 0            | 0            | 0                      | 0 |
| <b>Firmicutes</b>                                                            |                          |             |             |             |             |              |              |                        |   |
| Bacilli; Bacillales; Alicyclobacillaceae; <i>Alicyclobacillus</i>            | 0.09 (0.09)              | 0.01 (0.01) | 0           | 0           | 0           | 0            | 0            | 0.77 (0.57)            | 0 |
| Bacilli; Bacillales; Bacillaceae; <i>Bacillus</i>                            | 1.11 (0.61)              | 0.78 (0.29) | 0           | 0           | 0           | 0            | 0            | 0                      | 0 |
| Bacilli; Bacillales; Bacillaceae; <i>Ornithinibacillus</i>                   | 0.02 (0.02)              | 0           | 0           | 0           | 0           | 0            | 0            | 0                      | 0 |
| Bacilli; Bacillales; Paenibacillaceae; <i>Brevibacillus</i>                  | 0.07 (0.07)              | 0.06 (0.04) | 2.77 (0.91) | 2.05 (1.26) | 6.25 (4.84) | 10.17 (3.90) | 11.73 (3.66) | 0                      | 0 |
| Bacilli; Bacillales; Paenibacillaceae; <i>Paenibacillus</i>                  | 0.06 (0.05)              | 0.03 (0.03) | 0           | 0           | 0           | 0            | 0            | 0                      | 0 |
| Bacilli; Bacillales; Paenibacillaceae; <i>Thermobacillus</i>                 | 0                        | 0.05 (0.05) | 0           | 0           | 0           | 0            | 0            | 0                      | 0 |
| Bacilli; Bacillales; Planococcaceae; <i>Lysinibacillus</i>                   | 0.03 (0.02)              | 0.02 (0.02) | 0           | 0           | 0           | 0            | 0            | 0                      | 0 |
| Bacilli; Bacillales; Planococcaceae; <i>Solibacillus</i>                     | 0.10 (0.06)              | 0.12 (0.06) | 0           | 0           | 0           | 0            | 0            | 0                      | 0 |
| Bacilli; Bacillales; Planococcaceae; <i>Ureibacillus</i>                     | 0.11 (0.09)              | 0           | 0           | 0           | 0           | 0            | 0            | 0                      | 0 |
| Bacilli; Bacillales; Thermoactinomycetaceae; <i>Laceyella</i>                | 0.09 (0.06)              | 0           | 0           | 0           | 0           | 0            | 0            | 0                      | 0 |
| Bacilli; Bacillales; Thermoactinomycetaceae; <i>Planifilum</i>               | 0                        | 0.02 (0.02) | 0           | 0           | 0           | 0            | 0            | 0                      | 0 |
| Bacilli; Bacillales; Thermoactinomycetaceae; <i>Thermoactinomyces</i>        | 0.41 (0.20)              | 0.25 (0.13) | 0           | 0           | 0           | 0            | 0            | 0                      | 0 |
| Bacilli; Bacillales; Thermoactinomycetaceae; <i>Thermoactinomyces</i>        | 0.02 (0.02)              | 0           | 0           | 0           | 0           | 0            | 0            | 0                      | 0 |
| Bacilli; Lactobacillales; Aerococcaceae; <i>Alkalibacterium</i>              | 0                        | 0           | 0.23 (0.23) | 0           | 5.00 (3.00) | 1.68 (1.18)  | 2.93 (1.59)  | 0                      | 0 |
| Clostridia; Clostridiales; Clostridiaceae; <i>Alkaliphilus</i>               | 0                        | 0           | 0           | 0.69 (0.69) | 0.63 (0.63) | 0.65 (0.65)  | 0.42 (0.42)  | 0                      | 0 |
| Clostridia; Clostridiales; Clostridiaceae; <i>Clostridium</i>                | 0.04 (0.03)              | 0.01 (0.01) | 0.77 (0.57) | 2.86 (1.66) | 4.26 (3.53) | 1.05 (0.67)  | 2.75 (1.34)  | 0                      | 0 |
| Clostridia; Clostridiales; Clostridiaceae; <i>Oxobacter</i>                  | 0                        | 0.04 (0.04) | 0           | 0           | 0           | 0            | 0            | 0                      | 0 |
| Clostridia; Clostridiales; Peptostreptococcaceae; <i>Clostridium</i>         | 0                        | 0.03 (0.03) | 3.90 (3.02) | 6.00 (2.08) | 0           | 0.48 (0.28)  | 1.37 (0.86)  | 0                      | 0 |
| Clostridia; Clostridiales; Peptostreptococcaceae; [ <i>Clostridium</i> ]     | 0.02 (0.02)              | 0.08 (0.05) | 0           | 4.00 (1.02) | 0           | 0            | 8.00 (8.00)  | 0                      | 0 |
| Clostridia; Clostridiales; Veillonellaceae; <i>Pelosinus</i>                 | 0                        | 0           | 1.20 (0.78) | 4.21 (2.78) | 0           | 4.55 (1.67)  | 3.62 (1.63)  | 0                      | 0 |
| <b>Planctomycetes</b>                                                        |                          |             |             |             |             |              |              |                        |   |
| Planctomycetia; Planctomycetales; Planctomycetaceae; <i>Planctomyces</i>     | 0                        | 0.10 (0.10) | 0           | 0           | 0           | 0            | 0            | 0                      | 0 |
| <b>Alphaproteobacteria</b>                                                   |                          |             |             |             |             |              |              |                        |   |
| Caulobacterales; Caulobacteraceae; <i>Asticcacaulis</i>                      | 0                        | 0.02 (0.02) | 0           | 0           | 0           | 0            | 0            | 0                      | 0 |
| Caulobacterales; Caulobacteraceae; <i>Phenylobacterium</i>                   | 0.41 (0.21)              | 0.59 (0.34) | 0           | 0           | 0           | 0            | 0            | 0                      | 0 |
| Rhizobiales; Bradyrhizobiaceae; <i>Balneimonas</i>                           | 0.09 (0.06)              | 0.18 (0.07) | 0           | 0           | 0           | 0            | 0            | 0                      | 0 |
| Rhizobiales; Bradyrhizobiaceae; <i>Bradyrhizobium</i>                        | 0.34 (0.10)              | 0.13 (0.03) | 0.49 (0.30) | 0           | 0           | 0            | 0            | 0                      | 0 |
| Rhizobiales; Hyphomicrobiaceae; <i>Devosia</i>                               | 0.94 (0.32)              | 1.64 (0.48) | 0.91 (0.57) | 0           | 0           | 0            | 0            | 0                      | 0 |



Table S4 (continued)

| Taxon                                                                                           | Substrate   | Rhizosphere | Root         | Stem         | Leaves       | Spathe       | Spadix       |
|-------------------------------------------------------------------------------------------------|-------------|-------------|--------------|--------------|--------------|--------------|--------------|
| Rhizobiales; Hyphomicrobiaceae; <i>Hyphomicrobium</i>                                           | 0.44 (0.12) | 1.13 (0.61) | 0            | 0            | 0            | 0            | 0            |
| Rhizobiales; Hyphomicrobiaceae; <i>Pedomicrobium</i>                                            | 0.58 (0.22) | 0.41 (0.15) | 0            | 0            | 0            | 0            | 0            |
| Rhizobiales; Hyphomicrobiaceae; <i>Rhodoplanes</i>                                              | 8.05 (1.79) | 8.43 (1.44) | 0            | 0            | 0            | 0            | 0            |
| Rhizobiales; Methylobacteriaceae; <i>Methylobacterium</i>                                       | 0.21 (0.04) | 0.16 (0.06) | 0            | 0            | 0            | 0            | 0            |
| Rhizobiales; Methylocystaceae; <i>Pleomorphomonas</i>                                           | 0           | 0.02 (0.02) | 0            | 0            | 0            | 0            | 0            |
| Rhizobiales; Phyllobacteriaceae; <i>Mesorhizobium</i>                                           | 0.41 (0.12) | 0.34 (0.06) | 0            | 0            | 0            | 0            | 0            |
| Rhizobiales; Rhizobiaceae; <i>Agrobacterium</i>                                                 | 0.03 (0.02) | 0.05 (0.04) | 0            | 0            | 0            | 0            | 0            |
| Rhizobiales; Rhizobiaceae; <i>Rhizobium</i>                                                     | 0.01 (0.01) | 0           | 0            | 0            | 0            | 2.61 (1.43)  | 0            |
| Rhizobiales; Rhizobiaceae; <i>Sinorhizobium</i>                                                 | 0.02 (0.02) | 0.43 (0.09) | 0.88 (0.39)  | 0            | 0            | 0            | 0            |
| Rhizobiales; Rhodobiaceae; <i>Ajifella</i>                                                      | 0.08 (0.05) | 0.04 (0.03) | 0            | 0            | 0            | 0            | 0            |
| Rhizobiales; Xanthobacteraceae; <i>Labrys</i>                                                   | 0.07 (0.07) | 0.07 (0.07) | 0            | 0            | 0            | 0            | 0            |
| Rhodobacterales; Rhodobacteraceae; <i>Amaricoccus</i>                                           | 0.05 (0.03) | 0.13 (0.10) | 0            | 0            | 0            | 0            | 0            |
| Sphingomonadales; Erythrobacteraceae; <i>Altererythrobacter</i>                                 | 0.02 (0.02) | 0           | 0            | 0            | 0            | 0            | 0            |
| Sphingomonadales; Sphingomonadaceae; <i>Novosphingobium</i>                                     | 0           | 0.04 (0.04) | 0            | 0            | 0            | 0            | 0            |
| Sphingomonadales; Sphingomonadaceae; <i>Sphingobium</i>                                         | 0.10 (0.05) | 0.18 (0.07) | 0            | 0            | 0            | 0            | 0            |
| Sphingomonadales; Sphingomonadaceae; <i>Sphingopyxis</i>                                        | 0.03 (0.02) | 0.04 (0.03) | 0            | 0            | 0            | 0            | 0            |
| <b>Betaproteobacteria</b>                                                                       |             |             |              |              |              |              |              |
| Burkholderiales; Alcaligenaceae; <i>Achromobacter</i>                                           | 0           | 0.02 (0.02) | 6.06 (4.29)  | 2.92 (1.26)  | 0            | 0.40 (0.20)  | 1.96 (1.49)  |
| Burkholderiales; Burkholderiaceae; <i>Burkholderia</i>                                          | 0.04 (0.03) | 0.04 (0.02) | 0            | 0            | 0            | 0            | 0            |
| Burkholderiales; Comamonadaceae; <i>Acidovorax</i>                                              | 0.01 (0.01) | 0.02 (0.02) | 0.39 (0.17)  | 0            | 0            | 0            | 0.42 (0.22)  |
| Burkholderiales; Comamonadaceae; <i>Curvibacter</i>                                             | 0.07 (0.07) | 0           | 0            | 0            | 0            | 0            | 0            |
| Burkholderiales; Comamonadaceae; <i>Methylibium</i>                                             | 0.04 (0.03) | 0.04 (0.02) | 0            | 0            | 0            | 0            | 0            |
| Burkholderiales; Comamonadaceae; <i>Ramlibacter</i>                                             | 0.07 (0.07) | 0.03 (0.02) | 0            | 0            | 0.63 (0.33)  | 0            | 0            |
| Burkholderiales; Comamonadaceae; <i>Rubrivivax</i>                                              | 0.42 (0.21) | 0.33 (0.11) | 0            | 0            | 0            | 0            | 0            |
| Burkholderiales; Comamonadaceae; <i>Variovorax</i>                                              | 0.08 (0.08) | 0.06 (0.03) | 0            | 3.81 (1.82)  | 0            | 0            | 0            |
| Burkholderiales; Oxalobacteraceae; <i>Cupriavidus</i>                                           | 0.12 (0.08) | 0.04 (0.04) | 0            | 0            | 0            | 0            | 0            |
| Burkholderiales; Oxalobacteraceae; <i>Ralstonia</i>                                             | 0.03 (0.02) | 0.04 (0.03) | 0            | 0            | 0            | 0            | 0            |
| Rhodocyclales; Rhodocyclaceae; <i>Azoarcus</i>                                                  | 0.08 (0.08) | 0.02 (0.02) | 0            | 0            | 0            | 0.40 (0.20)  | 0            |
| <b>Deltaproteobacteria</b>                                                                      |             |             |              |              |              |              |              |
| Bdellovibrionales; Bdellovibrionaceae; <i>Bdellovibrio</i>                                      | 0           | 0.02 (0.02) | 0            | 0            | 0            | 0            | 0            |
| Myxococcales; Nannocystaceae; <i>Plesiocystis</i>                                               | 0           | 0.15 (0.10) | 0            | 0            | 0            | 0            | 0            |
| <b>Gammaproteobacteria</b>                                                                      |             |             |              |              |              |              |              |
| Legionellales; Coxiellaceae; <i>Aquicella</i>                                                   | 0.19 (0.08) | 0.16 (0.08) | 0            | 0            | 0            | 0            | 0            |
| Legionellales; Legionellaceae; <i>Legionella</i>                                                | 0.03 (0.03) | 0.08 (0.07) | 0            | 0            | 0            | 0            | 0            |
| Oceanospirillales; Halomonadaceae; <i>Halomonas</i>                                             | 0.39 (0.09) | 0.41 (0.15) | 0.68 (0.36)  | 0            | 0.63 (0.43)  | 1.12 (0.70)  | 0            |
| Pseudomonadales; Moraxellaceae; <i>Acinetobacter</i>                                            | 0.50 (0.37) | 0.04 (0.04) | 9.05 (4.79)  | 0.48 (0.48)  | 7.50 (3.11)  | 4.45 (3.70)  | 0            |
| Pseudomonadales; Pseudomonadaceae; <i>Pseudomonas</i>                                           | 0.49 (0.03) | 0.36 (0.18) | 15.25 (6.37) | 42.83 (9.16) | 38.10 (9.61) | 26.00 (4.82) | 30.19 (3.26) |
| Xanthomonadales; Sinobacteraceae; <i>Alkanibacter</i>                                           | 0.22 (0.11) | 0.12 (0.07) | 0            | 0            | 0            | 0            | 0            |
| Xanthomonadales; Sinobacteraceae; <i>Steroidobacter</i>                                         | 0.14 (0.06) | 0.13 (0.06) | 0            | 0            | 0            | 0            | 0            |
| Xanthomonadales; Xanthomonadaceae; <i>Dokdonella</i>                                            | 0.03 (0.02) | 0.02 (0.02) | 0            | 0            | 0            | 0            | 0            |
| Xanthomonadales; Xanthomonadaceae; <i>Lysobacter</i>                                            | 0.26 (0.09) | 0.16 (0.07) | 0            | 0            | 0            | 0            | 0            |
| Xanthomonadales; Xanthomonadaceae; <i>Rhodanobacter</i>                                         | 0.73 (0.49) | 0.21 (0.11) | 0            | 0            | 0            | 0            | 0            |
| Xanthomonadales; Xanthomonadaceae; <i>Stenotrophomonas</i>                                      | 0           | 0.02 (0.02) | 0            | 1.38 (0.83)  | 1.48 (1.48)  | 0            | 0.80 (0.49)  |
| Xanthomonadales; Xanthomonadaceae; <i>Thermomonas</i>                                           | 0.15 (0.06) | 0.38 (0.22) | 0            | 0            | 0            | 0            | 0            |
| Xanthomonadales; Xanthomonadaceae; <i>Xanthomonas</i>                                           | 0           | 0           | 0.61 (0.40)  | 0            | 1.25 (0.75)  | 0            | 0            |
| <b>Verrucomicrobia</b>                                                                          |             |             |              |              |              |              |              |
| Opitutae; Opitutales; Opitutaceae; <i>Opitutus</i>                                              | 0.03 (0.02) | 0.12 (0.06) | 0            | 0            | 0            | 0            | 0            |
| Verrucomicrobiae; Verrucomicrobiales; Verrucomicrobiaceae; <i>Luteolibacter</i>                 | 0.05 (0.05) | 0.03 (0.02) | 0            | 0            | 0            | 0            | 0            |
| <b>Other phyla</b>                                                                              |             |             |              |              |              |              |              |
| Armatimonadetes; [Fimbriimonadia]; [Fimbriimonadales]; [Fimbriimonadaceae]; <i>Fimbriimonas</i> | 0.85 (0.22) | 0.75 (0.35) | 0            | 0            | 0            | 2.40 (1.40)  | 0            |
| Gemmatimonadetes; Gemmatimonadetes; Ellin5290                                                   | 0.03 (0.02) | 0.07 (0.07) | 0            | 0            | 0            | 0            | 0            |
| Gemmatimonadetes; Gemmatimonadetes; N1423WL                                                     | 0.10 (0.07) | 0.13 (0.07) | 0            | 0            | 0            | 0            | 0            |
| Nitrospirae; Nitrospira; Nitrospirales; 0319-6A21                                               | 0.11 (0.08) | 0.05 (0.05) | 0            | 0            | 0            | 0            | 0            |
| Nitrospirae; Nitrospira; Nitrospirales; Nitrospiraceae; <i>Nitrospira</i>                       | 1.21 (0.49) | 0.94 (0.27) | 0            | 0            | 0            | 0            | 0            |
| Mollicutes; Anaeroplasmatales; Anaeroplasmataceae; <i>Asteroleplasma</i>                        | 0           | 0           | 4.13 (3.15)  | 0            | 0            | 0            | 0            |

<sup>a</sup> Numbers in parenthesis are the standard errors ( $n = 5$ )
